# Supplementary material
Source: PubMed Central journal article supplement (PMC7015789)
Supplement: NIHMS1539749-supplement-1.pdf [file NIHMS1539749-supplement-1.pdf]

Supplemental Table 1. Sensitivity analysis of violence exposure and theory of mind associations, adjusting for poverty and emotional neglect

|                                              | Cognitive theory of mind |                       | Affective theory of mind |                       |
|----------------------------------------------|--------------------------|-----------------------|--------------------------|-----------------------|
|                                              | Accuracy                 | Reaction time<br>(ms) | Accuracy                 | Reaction time<br>(ms) |
|                                              | F                        | F                     | F                        | F                     |
| Adjusting for poverty <sup>a</sup>           |                          |                       |                          |                       |
| Physical or sexual abuse                     | 5.31*                    | 0.05                  | 3.60                     | 2.85                  |
| Emotional abuse                              | 4.82*                    | 0.01                  | 8.45**                   | 3.03                  |
| Domestic violence                            | 1.59                     | 0.65                  | 0.09                     | 0.03                  |
|                                              | $\beta$                  | $\beta$               | $\beta$                  | $\beta$               |
| Violence frequency                           | -.23**                   | 0.06                  | -0.20**                  | 0.11                  |
| Adjusting for emotional neglect <sup>b</sup> |                          |                       |                          |                       |
| Physical or sexual abuse                     | 3.08                     | 0.03                  | 1.55                     | 2.91                  |
| Emotional abuse                              | 3.78*                    | 0.17                  | 9.75**                   | 3.88*                 |
| Domestic violence                            | 1.21                     | 0.17                  | 0.04                     | 0.01                  |
|                                              | $\beta$                  | $\beta$               | $\beta$                  | $\beta$               |
| Violence frequency                           | -.22**                   | 0.03                  | -0.21**                  | 0.13                  |

<sup>a</sup> Linear regressions controlling for age, sex and poverty<sup>b</sup> Linear regressions controlling for age, sex and emotional neglect\*\* $p \leq 0.01$ \* $p \leq 0.05$

Supplemental Table 2. Age x violence and theory of mind <sup>a b</sup>

|                          | Cognitive Theory of Mind |               | Affective Theory of Mind |               |
|--------------------------|--------------------------|---------------|--------------------------|---------------|
|                          | Accuracy                 | Reaction Time | Accuracy                 | Reaction Time |
|                          | β                        | β             | β                        | β             |
| Age x Violence           |                          |               |                          |               |
| Physical or Sexual Abuse | 0.13                     | 0.04          | 0.11                     | -0.03         |
| Emotional Abuse          | -0.02                    | 0.09          | 0.04                     | 0.06          |
| Domestic Violence        | -0.93                    | 0.09          | -0.06                    | 0.05          |
| Violence Frequency       | -0.04                    | 0.06          | -0.59                    | -0.01         |

<sup>a</sup> Values represent interaction of age and violence exposure variables

<sup>b</sup> Linear regressions controlling for sex

\*\*p ≤ 0.01

\*p ≤ 0.05

Supplemental Table 3. Age x cognitive and affective theory of mind task performance and externalizing problems <sup>a</sup>

|                                | Highest CBCL or YSR T-Score <sup>b</sup> | KSADS Current Diagnosis <sup>c</sup> |                               |
|--------------------------------|------------------------------------------|--------------------------------------|-------------------------------|
|                                | Externalizing                            | Conduct Disorder                     | Oppositional Defiant Disorder |
|                                | $\beta$                                  | OR                                   | OR                            |
| Age x Cognitive theory of mind |                                          |                                      |                               |
| Accuracy                       | -0.39                                    | 0.01                                 | 0.21                          |
| Reaction time (ms)             | 0.10                                     | 1.00                                 | 1.00                          |
| Age x Affective theory of mind |                                          |                                      |                               |
| Accuracy                       | 0.01                                     | 0.34                                 | 0.32                          |
| Reaction time (ms)             | -0.04                                    | 1.00                                 | 0.76                          |

<sup>a</sup> Values represent interaction of age and theory of mind variables<sup>b</sup> Linear regressions controlling for sex<sup>c</sup> Logistic regressions controlling for sex\*\* $p \leq 0.01$ \* $p \leq 0.05$
